# Supplementary material for: Hair Growth Effect of DN106212 in C57BL/6 Mouse and Its Network Pharmacological Mechanism of Action
Source: MDPI journal article supplement (doi:10.3390/cimb45060322), 2023-06-09
Supplement: s1 [file s1]

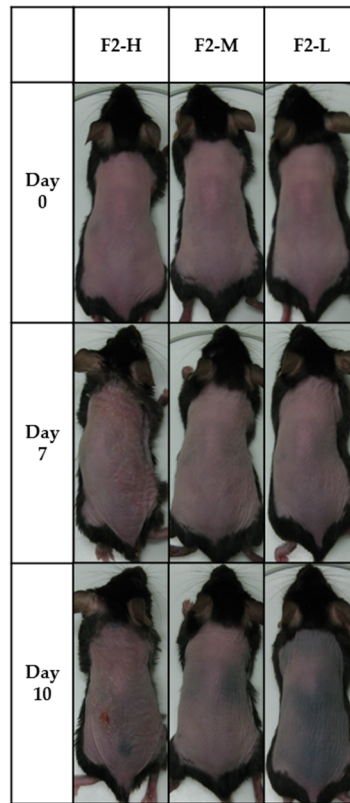

**Figure S1.** Skin testing of DN106212 at various concentrations in C57BL/6 mice (n=6). DN106212 was topically applied to the mouse skin at three different concentrations, with each concentration receiving a 100  $\mu$ L treatment for a duration of 10 days. F2-H; high dose, F2-M; medium dose, F2-L; low dose.

**Table S1.** The effect of DN106212 on hair growth in C57BL/6 mice. Comparison of percentage of area hair regrowth on day 0, 7, 10, 13, and 16 among all groups. Data were presented as mean  $\pm$  SD, n=6 in each group. \* $p$ <0.05 (compared with CTL) and # $p$ <0.05 (compared with TF).

| (%)    | CTL               | TF                            | DN106212                      |
|--------|-------------------|-------------------------------|-------------------------------|
| Day 0  | 0.00 $\pm$ 5.19   | 0.00 $\pm$ 1.77               | 0.00 $\pm$ 5.12               |
| Day 7  | 0.02 $\pm$ 3.43   | 0.00 $\pm$ 5.55               | 0.00 $\pm$ 3.42               |
| Day 10 | 7.87 $\pm$ 15.04  | 8.15 $\pm$ 5.47               | 2.94 $\pm$ 3.14               |
| Day 13 | 18.43 $\pm$ 10.09 | 12.77 $\pm$ 5.16              | 28.63 $\pm$ 7.39 <sup>#</sup> |
| Day 16 | 24.14 $\pm$ 12.16 | 49.16 $\pm$ 8.52 <sup>*</sup> | 51.00 $\pm$ 5.28 <sup>*</sup> |
